# Supplementary material
Source: PubMed Central journal article supplement (PMC6204694)
Supplement: zii999092580s1.pdf [file zii999092580s1.pdf]

Table S1 Protein regions used in library constructs and primer sequences.

| Proteins*           | Predicted functions                                                                                       | Primer names | Sequences                                         |
|---------------------|-----------------------------------------------------------------------------------------------------------|--------------|---------------------------------------------------|
| SP0010<br>(23-end)  | hypothetical protein                                                                                      | Sp0010-1     | CGGGATCCGAATTCGAGCTCCG<br>AAAAAGAAGTCGTCTATAC     |
|                     |                                                                                                           | Sp0010-2     | CTCGAGTGCGGCCGCAAGCTTT<br>TTTAGAACCTCATAAACATC    |
| SP0043<br>(42-end)  | competence factor<br>transport protein<br>ComB                                                            | Sp0043-1     | CGGGATCCGAATTCGAGCTCCG<br>AGAAGGAGATGAGTTTGTC     |
|                     |                                                                                                           | Sp0043-2     | CTCGAGTGCGGCCGCAAGCTTC<br>TCTTTGTTCAAAAATTGATC    |
| SP0079<br>(24-end)  | potassium uptake<br>protein, Trk family                                                                   | Sp0079-1     | CGGGATCCGAATTCGAGCTCCA<br>AGCAGGATATGAATATTATC    |
|                     |                                                                                                           | Sp0079-2     | CTCGAGTGCGGCCGCAAGCTTC<br>GAATTCAATGCTACTAGG      |
| SP0084<br>(110-end) | histidine kinase (EC<br>2.7.13.3) (IMGterm)                                                               | Sp0084-1     | CGGGATCCGAATTCGAGCTCCT<br>TTGATTCCTTGAAGAAAG      |
|                     |                                                                                                           | Sp0084-2     | CTCGAGTGCGGCCGCAAGCTTG<br>GCTTTATTTTCACTACCAG     |
| SP0092<br>(30-end)  | carbohydrate ABC<br>transporter substrate-<br>binding protein, CUT1<br>family (TC 3.A.1.1.-)<br>(IMGterm) | Sp0092-1     | CGGGATCCGAATTCGAGCTCCA<br>ACAGCAAAAAGCTGCTG       |
|                     |                                                                                                           | Sp0092-2     | CTCGAGTGCGGCCGCAAGCTTT<br>TTTTTGTTTTTCAAGAATTCATC |
| SP0098<br>(30-end)  | hypothetical protein                                                                                      | Sp0098-1     | CGGGATCCGAATTCGAGCTCCG<br>ACGGGATTAAGAGCCTAC      |

|                    |                                                       |          |                                                 |
|--------------------|-------------------------------------------------------|----------|-------------------------------------------------|
|                    |                                                       | Sp0098-2 | CTCGAGTGCGGCCGCAAGCTTA<br>CGTCTGCTTGGTGTGGAT    |
| SP0106<br>(29-end) | L-serine ammonia-<br>lyase (EC 4.3.1.17)<br>(IMGterm) | Sp0106-1 | CGGGATCCGAATTCGAGCTCCG<br>TTCGTATTGGGAAGATTG    |
|                    |                                                       | Sp0106-2 | CTCGAGTGCGGCCGCAAGCTTT<br>TTAAAGAAATTGACATTGTG  |
| SP0107<br>(30-end) | LysM domain protein                                   | Sp0107-1 | CGGGATCCGAATTCGAGCTCCC<br>AAGAATCATCAACTTACAC   |
|                    |                                                       | Sp0107-2 | CTCGAGTGCGGCCGCAAGCTTA<br>TACCAGCCATTGTTAAGCC   |
| SP0127<br>(26-end) | hypothetical protein                                  | Sp0127-1 | CGGGATCCGAATTCGAGCTCCG<br>AGACGACGATTAATATTAAG  |
|                    |                                                       | Sp0127-2 | CTCGAGTGCGGCCGCAAGCTTT<br>AGGCGTTTAATGTAAGACTC  |
| SP0149<br>(25-end) | lipoprotein                                           | Sp0149-1 | CGGGATCCGAATTCGAGCTCCA<br>ACTCAGAAAAGAAAGCAGAC  |
|                    |                                                       | Sp0149-2 | CTCGAGTGCGGCCGCAAGCTTC<br>CAAACGGTTGATCCAAAC    |
| SP0191<br>(26-end) | hypothetical protein                                  | Sp0191-1 | CGGGATCCGAATTCGAGCTCCC<br>CAGCTACAAAAACAGAAAAAG |
|                    |                                                       | Sp0191-2 | CTCGAGTGCGGCCGCAAGCTTT<br>TGTTCTGTCGCGCCATTTGC  |
| SP0198<br>(45-end) | hypothetical protein                                  | Sp0198-1 | CGGGATCCGAATTCGAGCTCCA<br>ATACCAATACTGCAAATGC   |
|                    |                                                       | Sp0198-2 | CTCGAGTGCGGCCGCAAGCTTT<br>TTAGTTAAAACGATTTGGTC  |
| SP0249             | PTS system, IIB                                       | Sp0249-1 | CGGGATCCGAATTCGAGCTCCC                          |

|                    |                                                                                                                                                                                               |          |                                                 |
|--------------------|-----------------------------------------------------------------------------------------------------------------------------------------------------------------------------------------------|----------|-------------------------------------------------|
| (26-end)           | component                                                                                                                                                                                     |          | AATCTAGTGGAGTTGAGG                              |
|                    |                                                                                                                                                                                               | Sp0249-2 | CTCGAGTGCGGCCGCAAGCTTC<br>CCACTAATCAAAGATAGG    |
| SP0321<br>(1-end)  | PTS system, IIA<br>component                                                                                                                                                                  | Sp0321-1 | CGGGATCCGAATTCGAGCTCCA<br>TGAAAATTGACTTGTAG     |
|                    |                                                                                                                                                                                               | Sp0321-2 | CTCGAGTGCGGCCGCAAGCTTA<br>ATACCCGATTCGAAATCTTC  |
| SP0346<br>(98-end) | capsular<br>polysaccharide<br>biosynthesis protein<br>Cps4A                                                                                                                                   | Sp0346-1 | CGGGATCCGAATTCGAGCTCCG<br>GACTGACCAATCGTTTAAATG |
|                    |                                                                                                                                                                                               | Sp0346-2 | CTCGAGTGCGGCCGCAAGCTTT<br>CTACCCTCCATCACATCC    |
| SP0402<br>(29-end) | signal peptidase.<br>Serine peptidase.<br>MEROPS family S26A<br>(IMGterm)                                                                                                                     | Sp0402-1 | CGGGATCCGAATTCGAGCTCCT<br>GGAGCAATGTTTCGCGTAG   |
|                    |                                                                                                                                                                                               | Sp0402-2 | CTCGAGTGCGGCCGCAAGCTTA<br>AATGTTCCGATACGGGTG    |
| SP0453<br>(25-298) | amino acid ABC<br>transporter substrate-<br>binding protein, PAAT<br>family (TC 3.A.1.3.-) /<br>amino acid ABC<br>transporter membrane<br>protein, PAAT family<br>(TC 3.A.1.3.-)<br>(IMGterm) | Sp0453-1 | CGGGATCCGAATTCGAGCTCCG<br>ATGAATATTTACGCATCG    |
|                    |                                                                                                                                                                                               | Sp0453-2 | CTCGAGTGCGGCCGCAAGCTTA<br>CCAGCACCACGCAAGAG     |
| SP0564<br>(21-end) | hypothetical protein                                                                                                                                                                          | Sp0564-1 | CGGGATCCGAATTCGAGCTCCT<br>TTTCAAGTACGGTACTAAG   |
|                    |                                                                                                                                                                                               | Sp0564-2 | CTCGAGTGCGGCCGCAAGCTTC                          |

|                     |                                                                                                         |          |                                                  |
|---------------------|---------------------------------------------------------------------------------------------------------|----------|--------------------------------------------------|
|                     |                                                                                                         |          | TTGAACTTGATGCCATTTTC                             |
| SP0582<br>(92-end)  | hypothetical protein                                                                                    | Sp0582-1 | CGGGATCCGAATTCGAGCTCCG<br>ATAAAACCCTTTCTTCTGC    |
|                     |                                                                                                         | Sp0582-2 | CTCGAGTGCGGCCGCAAGCTTA<br>AATGTGATTTCTGTAAAAATAC |
| SP0589<br>(36-end)  | serine O-<br>acetyltransferase (EC<br>2.3.1.30) (IMGterm)                                               | Sp0589-1 | CGGGATCCGAATTCGAGCTCCG<br>CCCACCGTCTCTCGCAT      |
|                     |                                                                                                         | Sp0589-2 | CTCGAGTGCGGCCGCAAGCTTC<br>AAACCAGACGATCTGTGAC    |
| SP0601<br>(36-297)  | transmembrane<br>protein Vexp3                                                                          | Sp0601-1 | CGGGATCCGAATTCGAGCTCCA<br>TCAAGGGAGCTACTGCCAAG   |
|                     |                                                                                                         | Sp0601-2 | CTCGAGTGCGGCCGCAAGCTTC<br>ATACCAGAGATAGATTGCTC   |
| SP0604<br>(223-end) | sensor histidine<br>kinase VncS                                                                         | Sp0604-1 | CGGGATCCGAATTCGAGCTCCG<br>AAGCCATTCTCCAGCTGG     |
|                     |                                                                                                         | Sp0604-2 | CTCGAGTGCGGCCGCAAGCTTG<br>TCTTGGACGACTTTTGG      |
| SP0617<br>(44-end)  | hypothetical protein                                                                                    | Sp0617-1 | CGGGATCCGAATTCGAGCTCCA<br>ACGGAGATTTTCAAGGAGC    |
|                     |                                                                                                         | Sp0617-2 | CTCGAGTGCGGCCGCAAGCTTC<br>TCACTAGTCTCATATATTTTTC |
| SP0620<br>(27-end)  | amino acid ABC<br>transporter substrate-<br>binding protein, PAAT<br>family (TC 3.A.1.3.-)<br>(IMGterm) | Sp0620-1 | CGGGATCCGAATTCGAGCTCCA<br>GCGCTCAAAGACAATCG      |
|                     |                                                                                                         | Sp0620-2 | CTCGAGTGCGGCCGCAAGCTTT<br>TGTAAGTACTGAGATTGATCTG |
| SP0629              | D-Ala-D-Ala                                                                                             | Sp0629-1 | CGGGATCCGAATTCGAGCTCCC                           |

|                          |                                                                            |          |                                                |
|--------------------------|----------------------------------------------------------------------------|----------|------------------------------------------------|
| (21-end)                 | carboxypeptidase.<br>Metallo peptidase.<br>MEROPS family<br>M15B (IMGterm) |          | AAGAAAAAACAAAAATGAAG                           |
|                          |                                                                            | Sp0629-2 | CTCGAGTGCGGCCGCAAGCTTA<br>TCGACGTAGTCTCCGCC    |
| SP0648<br>(40-776)       | beta-galactosidase<br>(EC:3.2.1.23)<br>(IMGterm)                           | Sp0648-1 | CGGGATCCGAATTCGAGCTCCG<br>AATCTGTAGTTTATGCGG   |
|                          |                                                                            | Sp0648-2 | CTCGAGTGCGGCCGCAAGCTTT<br>GCTAATTCTTTGTTTTCC   |
| SP0648<br>(777-<br>1676) |                                                                            | Sp0648-3 | CGGGATCCGAATTCGAGCTCCT<br>CCAAAGTAGCTGACTCAG   |
|                          |                                                                            | Sp0648-4 | CTCGAGTGCGGCCGCAAGCTTA<br>GACTCAAGGTAGTAGTCTG  |
| SP0648<br>(1677-<br>end) |                                                                            | Sp0648-5 | CGGGATCCGAATTCGAGCTCCG<br>TAGATGGAAAAGTTCCG    |
|                          |                                                                            | Sp0648-6 | CTCGAGTGCGGCCGCAAGCTTG<br>TCTTCTTTTTTACCTTTAG  |
| SP0659<br>(28-end)       | thioredoxin family<br>protein                                              | Sp0659-1 | CGGGATCCGAATTCGAGCTCCG<br>AACACCAAACGAAAGATG   |
|                          |                                                                            | Sp0659-2 | CTCGAGTGCGGCCGCAAGCTTG<br>GCTAATTCCTTCAAAGTTTG |
| SP0662<br>(29-276)       | sensor histidine<br>kinase, putative                                       | Sp0662-1 | CGGGATCCGAATTCGAGCTCCT<br>ACTATCAATCAAGTTCTTC  |
|                          |                                                                            | Sp0662-2 | CTCGAGTGCGGCCGCAAGCTTG<br>AGCTGACTCCGAACCTGGTC |
| SP0662<br>(300-end)      |                                                                            | Sp0662-3 | CGGGATCCGAATTCGAGCTCCA<br>AACGCTGGATTGCTCCT    |
|                          |                                                                            | Sp0662-4 | CTCGAGTGCGGCCGCAAGCTTG                         |

|                      |                                          |          |                                                  |
|----------------------|------------------------------------------|----------|--------------------------------------------------|
|                      |                                          |          | CTAGTTTCTATTCTATTTAT                             |
| SP0664<br>(103-629)  | zinc metalloprotease<br>ZmpB             | Sp0664-1 | CGGGATCCGAATTCGAGCTCCA<br>CCCTAGCGCTGGCTAGTCG    |
|                      |                                          | Sp0664-2 | CTCGAGTGCGGCCGCAAGCTTC<br>TCAACTTTTTTAAGATCTA    |
| SP0664<br>(630-1200) |                                          | Sp0664-3 | CGGGATCCGAATTCGAGCTCCC<br>TTAAAAATATTAAACGTAC    |
|                      |                                          | Sp0664-4 | CTCGAGTGCGGCCGCAAGCTTG<br>ATTGCATTA ACTCTATAGTC  |
| SP0664<br>(1201-end) |                                          | Sp0664-5 | CGGGATCCGAATTCGAGCTCCA<br>AAGATTTATATTTAGAAG     |
|                      |                                          | Sp0664-6 | CTCGAGTGCGGCCGCAAGCTTT<br>TTAAAGATTGAAGTTTTAAAGC |
| SP0678<br>(23-end)   | hypothetical protein                     | Sp0678-1 | CGGGATCCGAATTCGAGCTCCC<br>GTATTCGCCGTGCGGCTA     |
|                      |                                          | Sp0678-2 | CTCGAGTGCGGCCGCAAGCTTG<br>CTAGTCTTCACTTTCC       |
| SP0724<br>(35-end)   | hydroxyethylthiazole<br>kinase, putative | Sp0724-1 | CGGGATCCGAATTCGAGCTCCG<br>ATGATTCCCGTGAAGTTC     |
|                      |                                          | Sp0724-2 | CTCGAGTGCGGCCGCAAGCTTT<br>TCATAAACCTCTCCTTTG     |
| SP0742<br>(43-end)   | hypothetical protein                     | Sp0742-1 | CGGGATCCGAATTCGAGCTCCG<br>CTGATCAGGTCTTTGTTG     |
|                      |                                          | Sp0742-2 | CTCGAGTGCGGCCGCAAGCTTA<br>TCAATTT CATAGCCCATCAG  |
| SP0757<br>(44-451)   | cell division protein<br>FtsX (IMGterm)  | Sp0757-1 | CGGGATCCGAATTCGAGCTCCA<br>TTTTCAATACAGCGAAAC     |

|                     |                                                                                   |          |                                                   |
|---------------------|-----------------------------------------------------------------------------------|----------|---------------------------------------------------|
|                     |                                                                                   | Sp0757-2 | CTCGAGTGCGGCCGCAAGCTTA<br>AATGAAGCTAACTTGAAGAG    |
| SP0785<br>(33-end)  | hypothetical protein                                                              | Sp0785-1 | CGGGATCCGAATTCGAGCTCCT<br>TTAGACAACCTTCTCAGAC     |
|                     |                                                                                   | Sp0785-2 | CTCGAGTGCGGCCGCAAGCTTA<br>TTAGTTGCTTCATCAGCC      |
| SP0787<br>(43-290)  | hypothetical protein                                                              | Sp0787-1 | CGGGATCCGAATTCGAGCTCCT<br>CTCGTCAAGTCAATAAAG      |
|                     |                                                                                   | Sp0787-2 | CTCGAGTGCGGCCGCAAGCTTC<br>GTCGTCATAAACTAAACG      |
| SP0872<br>(30-end)  | D,D-carboxypeptidase<br>PBP3. Serine<br>peptidase. MEROPS<br>family S11 (IMGterm) | Sp0872-1 | CGGGATCCGAATTCGAGCTCCA<br>AACATGCGATTGCTGTTG      |
|                     |                                                                                   | Sp0872-2 | CTCGAGTGCGGCCGCAAGCTTT<br>AATTTCTCGTTAACAAAGCG    |
| SP0878<br>(245-end) | SpoE family protein                                                               | Sp0878-1 | CGGGATCCGAATTCGAGCTCCA<br>CAGAGGAAGCTGTTCAAATC    |
|                     |                                                                                   | Sp0878-2 | CTCGAGTGCGGCCGCAAGCTTT<br>TGTTGTAACACTTTTCGAGG    |
| SP0899<br>(31-end)  | hypothetical protein                                                              | Sp0899-1 | CGGGATCCGAATTCGAGCTCCG<br>AGGGGACGAATCAAAGGC      |
|                     |                                                                                   | Sp0899-2 | CTCGAGTGCGGCCGCAAGCTTA<br>AGTTTAACCCACTTATCATTATC |
| SP1002<br>(22-end)  | adhesion lipoprotein                                                              | Sp1002-1 | CGGGATCCGAATTCGAGCTCCG<br>GTCAAAGGAAAGTCAGAC      |
|                     |                                                                                   | Sp1002-2 | CTCGAGTGCGGCCGCAAGCTTC<br>TTAATTCTTCTGCTAGAATAC   |
| SP1026              | hypothetical protein                                                              | Sp1026-1 | CGGGATCCGAATTCGAGCTCCG                            |

|                             |                                                                       |          |                                                   |
|-----------------------------|-----------------------------------------------------------------------|----------|---------------------------------------------------|
| (24-end)                    |                                                                       |          | TTCATCAAGATGTCAAAC                                |
|                             |                                                                       | Sp1026-2 | CTCGAGTGCGGCCGCAAGCTTG<br>CCAGATGTTGAAAAGAGAG     |
| SP1032<br>(22-end)          | iron-compound ABC<br>transporter, iron<br>compound-binding<br>protein | Sp1032-1 | CGGGATCCGAATTCGAGCTCCT<br>CTAATTCTGTAAAAATGAAG    |
|                             |                                                                       | Sp1032-2 | CTCGAGTGCGGCCGCAAGCTTT<br>TTCGCATTTTTGCATGCATTC   |
| SP1069<br>(34-end)          | hypothetical protein                                                  | Sp1069-1 | CGGGATCCGAATTCGAGCTCCT<br>CTTCAATGAATAAATCAG      |
|                             |                                                                       | Sp1069-2 | CTCGAGTGCGGCCGCAAGCTTT<br>TCGATGACTTGTCTGCTTC     |
| SP1154-<br>1 (155-<br>694)  | IgA1-specific<br>metallopeptidase.<br>MEROPS family M26<br>(IMGterm)  | Sp1154-1 | CGGGATCCGAATTCGAGCTCCG<br>AAAATCATCTTTTGCTAAATTAC |
|                             |                                                                       | Sp1154-2 | CTCGAGTGCGGCCGCAAGCTTT<br>GTGTTTGATTCGGTTGAAAC    |
| SP1154-<br>2 (695-<br>1374) |                                                                       | Sp1154-3 | CGGGATCCGAATTCGAGCTCCT<br>CCAATTCAAATGGAAACG      |
|                             |                                                                       | Sp1154-4 | CTCGAGTGCGGCCGCAAGCTTA<br>CCAAAGAAGTCCAAATGG      |
| SP1154-<br>3 (1375-<br>end) |                                                                       | Sp1154-5 | CGGGATCCGAATTCGAGCTCCA<br>AGGGGAATGCTTCACCATTAG   |
|                             |                                                                       | Sp1154-6 | CTCGAGTGCGGCCGCAAGCTTT<br>TTTTTATTCTCAAAAATTG     |
| SP1267<br>(25-end)          | licC protein                                                          | Sp1267-1 | CGGGATCCGAATTCGAGCTCCT<br>TGGTTCAGGTTAATCAAAAAC   |
|                             |                                                                       | Sp1267-2 | CTCGAGTGCGGCCGCAAGCTTA<br>TTTTCGTTTTTAAGAATTC     |



|                    |                                                                                        |          |                                                 |
|--------------------|----------------------------------------------------------------------------------------|----------|-------------------------------------------------|
| SP1376<br>(32-end) | shikimate<br>dehydrogenase (EC<br>1.1.1.25) (IMGterm)                                  | Sp1376-1 | CGGGATCCGAATTCGAGCTCCG<br>CGACAGCTACCAACGGTG    |
|                    |                                                                                        | Sp1376-2 | CTCGAGTGCGGCCGCAAGCTTT<br>TGGTATTTTTCTGTAAAG    |
| SP1386<br>(33-end) | spermidine/putrescine<br>ABC transporter,<br>spermidine/putrescine<br>-binding protein | Sp1386-1 | CGGGATCCGAATTCGAGCTCCG<br>ATAGTCAAAAATTGGTTATC  |
|                    |                                                                                        | Sp1386-2 | CTCGAGTGCGGCCGCAAGCTTC<br>TTCCGATACATTTTAACTG   |
| SP1404<br>(31-end) | hypothetical protein                                                                   | Sp1404-1 | CGGGATCCGAATTCGAGCTCCG<br>CCTATGAAGGCAAAGTAG    |
|                    |                                                                                        | Sp1404-2 | CTCGAGTGCGGCCGCAAGCTTC<br>TTCCAAGAGAAATCTTTC    |
| SP1405<br>(19-end) | transcriptional<br>regulator Spx                                                       | Sp1405-1 | CGGGATCCGAATTCGAGCTCCT<br>GGTTAGAAAAACATAAGG    |
|                    |                                                                                        | Sp1405-2 | CTCGAGTGCGGCCGCAAGCTTC<br>TAATACCAGCTCTCATTC    |
| SP1419<br>(27-end) | acetyltransferase,<br>GNAT family                                                      | Sp1419-1 | CGGGATCCGAATTCGAGCTCCA<br>TGTTTTCAAATTGGGCTTC   |
|                    |                                                                                        | Sp1419-2 | CTCGAGTGCGGCCGCAAGCTTA<br>CATTCTTCCCTACTTATACC  |
| SP1479<br>(40-end) | peptidoglycan N-<br>acetylglucosamine<br>deacetylase A                                 | Sp1479-1 | CGGGATCCGAATTCGAGCTCCA<br>AGATCTACCAGCAAAAAG    |
|                    |                                                                                        | Sp1479-2 | CTCGAGTGCGGCCGCAAGCTTT<br>TCATCACGACTATAGTACAGC |
| SP1500<br>(27-end) | amino acid ABC<br>transporter substrate-<br>binding protein, PAAT                      | Sp1500-1 | CGGGATCCGAATTCGAGCTCCA<br>CTAGTGGAGATAATTGGTC   |
|                    |                                                                                        | Sp1500-2 | CTCGAGTGCGGCCGCAAGCTTC                          |

|                    |                                                                                                           |          |                                                    |
|--------------------|-----------------------------------------------------------------------------------------------------------|----------|----------------------------------------------------|
|                    | family (TC 3.A.1.3.-)<br>(IMGterm)                                                                        |          | TGTCCTTCTTTTACTTCTTTG                              |
| SP1545<br>(29-end) | hypothetical protein                                                                                      | Sp1545-1 | CGGGATCCGAATTCGAGCTCCG<br>AAGGAGAAAAATTAGCTC       |
|                    |                                                                                                           | Sp1545-2 | CTCGAGTGCGGCCGCAAGCTTT<br>AGGCCCTCCTTGTGACC        |
| SP1560<br>(28-end) | hypothetical protein                                                                                      | Sp1560-1 | CGGGATCCGAATTCGAGCTCCC<br>AAAACAGTACCAGTGCTAG      |
|                    |                                                                                                           | Sp1560-2 | CTCGAGTGCGGCCGCAAGCTTA<br>TTCGTTTTTGAAGTAGTTGC     |
| SP1624<br>(1-217)  | 1-acyl-sn-glycerol-3-<br>phosphate<br>acyltransferase (EC<br>2.3.1.51) (IMGterm)                          | Sp1624-1 | CGGGATCCGAATTCGAGCTCCA<br>TGTTTTATACTTATTTGCGTG    |
|                    |                                                                                                           | Sp1624-2 | CTCGAGTGCGGCCGCAAGCTTG<br>GCAGGGATGCGGATAAACC      |
| SP1652<br>(62-397) | hypothetical protein                                                                                      | Sp1652-1 | CGGGATCCGAATTCGAGCTCCA<br>AAGTAACCAGTCCCAACATGG    |
|                    |                                                                                                           | Sp1652-2 | CTCGAGTGCGGCCGCAAGCTTA<br>CTGGATGAAGCATTGCTATAC    |
| SP1683<br>(65-end) | carbohydrate ABC<br>transporter substrate-<br>binding protein, CUT1<br>family (TC 3.A.1.1.-)<br>(IMGterm) | Sp1683-1 | CGGGATCCGAATTCGAGCTCCA<br>AATCAATCATCGAAGCGTTTG    |
|                    |                                                                                                           | Sp1683-2 | CTCGAGTGCGGCCGCAAGCTTT<br>TGTTTCATAGCTTTTTTGTGATTG |
| SP1826<br>(36-end) | ABC transporter,<br>substrate-binding<br>protein                                                          | Sp1826-1 | CGGGATCCGAATTCGAGCTCCA<br>TGCCTAATTATAAATTTGTTG    |
|                    |                                                                                                           | Sp1826-2 | CTCGAGTGCGGCCGCAAGCTTT<br>TTTCTACCCTCCTTTTCC       |

|                    |                                                                          |          |                                                 |
|--------------------|--------------------------------------------------------------------------|----------|-------------------------------------------------|
| SP1872<br>(40-end) | iron-compound ABC transporter, iron-compound-binding protein             | Sp1872-1 | CGGGATCCGAATTCGAGCTCCG<br>AAGAAAAAGCTGATAAAAGTC |
|                    |                                                                          | Sp1872-2 | CTCGAGTGCGGCCGCAAGCTTG<br>CTGAATTAGAATACGTACAA  |
| SP1891<br>(40-end) | oligopeptide ABC transporter, oligopeptide-binding protein AmiA          | Sp1891-1 | CGGGATCCGAATTCGAGCTCCA<br>CAGAGGTAACCATTAAG     |
|                    |                                                                          | Sp1891-2 | CTCGAGTGCGGCCGCAAGCTTT<br>TTCAAAGCTTTTTGTATGTC  |
| SP1897<br>(30-end) | multiple sugar-binding protein (IMGterm)                                 | Sp1897-1 | CGGGATCCGAATTCGAGCTCCG<br>CGGATGGCACAGTGACC     |
|                    |                                                                          | Sp1897-2 | CTCGAGTGCGGCCGCAAGCTTA<br>TCCACATCCGCTTTCATC    |
| SP1942<br>(37-end) | transcriptional regulator, putative                                      | Sp1942-1 | CGGGATCCGAATTCGAGCTCCA<br>AAACCTATAAAAAAATCGGTG |
|                    |                                                                          | Sp1942-2 | CTCGAGTGCGGCCGCAAGCTTA<br>TTATCTTCATCACCAACAGG  |
| SP1966<br>(25-end) | UDP-N-acetylglucosamine 1-carboxyvinyltransferase (EC 2.5.1.7) (IMGterm) | Sp1966-1 | CGGGATCCGAATTCGAGCTCCG<br>CAGTCTTACCCTTGTTGGC   |
|                    |                                                                          | Sp1966-2 | CTCGAGTGCGGCCGCAAGCTTT<br>TCATCTTCATCACTTGCC    |
| SP1967<br>(30-end) | hypothetical protein                                                     | Sp1967-1 | CGGGATCCGAATTCGAGCTCCA<br>TAGAGGTTCCAGGTGGTTCG  |
|                    |                                                                          | Sp1967-2 | CTCGAGTGCGGCCGCAAGCTTG<br>GGATTGTTTTTCAAGTAATC  |
| SP1998<br>(51-end) | asparaginase (EC 3.5.1.1) (IMGterm)                                      | Sp1998-1 | CGGGATCCGAATTCGAGCTCCG<br>GGATTGTTTTTCAAGTAATC  |

|                     |                                                                                                        |          |                                                |
|---------------------|--------------------------------------------------------------------------------------------------------|----------|------------------------------------------------|
|                     |                                                                                                        | Sp1998-2 | CTCGAGTGCGGCCGCAAGCTTG<br>CCTTCCATATAGTCTTTC   |
| SP2048<br>(40-end)  | hypothetical protein                                                                                   | Sp2048-1 | CGGGATCCGAATTCGAGCTCCA<br>GTCAGCTCCTCATTTCAG   |
|                     |                                                                                                        | Sp2048-2 | CTCGAGTGCGGCCGCAAGCTTA<br>CTTTTTCTTTTTCCACAC   |
| SP2050<br>(35-end)  | competence protein<br>CglD                                                                             | Sp2050-1 | CGGGATCCGAATTCGAGCTCCG<br>TAGAGGAACAGATTTTCT   |
|                     |                                                                                                        | Sp2050-2 | CTCGAGTGCGGCCGCAAGCTTA<br>TTTTTTGTTTCCTTAATGCG |
| SP2083<br>(192-end) | sensor histidine<br>kinase PnpS                                                                        | Sp2083-1 | CGGGATCCGAATTCGAGCTCCT<br>TTAGCCCCACCCAATCTGTG |
|                     |                                                                                                        | Sp2083-2 | CTCGAGTGCGGCCGCAAGCTTG<br>TCCTGTGCGAAAGATTGG   |
| SP2084<br>(30-end)  | phosphate ABC<br>transporter substrate-<br>binding protein, PhoT<br>family (TC 3.A.1.7.1)<br>(IMGterm) | Sp2084-1 | CGGGATCCGAATTCGAGCTCCA<br>AACAGTCAGCTTCAGGAAC  |
|                     |                                                                                                        | Sp2084-2 | CTCGAGTGCGGCCGCAAGCTTT<br>TTAATCTTGTCCCAGGTGG  |
| SP2088<br>(30-end)  | phosphate uptake<br>regulator, PhoU<br>(IMGterm)                                                       | Sp2088-1 | CGGGATCCGAATTCGAGCTCCG<br>CCTTACTGGCCTTAGCCTCC |
|                     |                                                                                                        | Sp2088-2 | CTCGAGTGCGGCCGCAAGCTTA<br>TTCAAATCCACTAGTTCTC  |
| SP2145<br>(1-end)   | antigen, cell wall<br>surface anchor family                                                            | Sp2145-1 | CGGGATCCGAATTCGAGCTCCA<br>TGAAACCACTACTTGAAACC |
|                     |                                                                                                        | Sp2145-2 | CTCGAGTGCGGCCGCAAGCTTG<br>TGACTIONGGTAACCAGCTG |

|                     |                                                            |          |                                                 |
|---------------------|------------------------------------------------------------|----------|-------------------------------------------------|
| SP2151<br>(25-end)  | carbamate kinase (EC<br>2.7.2.2) (IMGterm)                 | Sp2151-1 | CGGGATCCGAATTCGAGCTCCC<br>AACAAGAAGCTTTAGTTG    |
|                     |                                                            | Sp2151-2 | CTCGAGTGCGGCCGCAAGCTTT<br>CCTTTTTCAATAATTGTTCC  |
| SP2187<br>(32-end)  | hypothetical protein                                       | Sp2187-1 | CGGGATCCGAATTCGAGCTCCG<br>TAATGGAAGAAACAGGAT    |
|                     |                                                            | Sp2187-2 | CTCGAGTGCGGCCGCAAGCTTA<br>GTGAATAATAACTGGCGAATC |
| SP2192<br>(224-end) | sensor histidine<br>kinase                                 | Sp2192-1 | CGGGATCCGAATTCGAGCTCCG<br>AGCAAATTGTAAAATTGC    |
|                     |                                                            | Sp2192-2 | CTCGAGTGCGGCCGCAAGCTTC<br>AAGCTAATCTTAAATTCC    |
| SP2197<br>(30-end)  | ABC transporter,<br>substrate-binding<br>protein, putative | Sp2197-1 | CGGGATCCGAATTCGAGCTCCA<br>AAGACAACAAAGAGGCAGAAC |
|                     |                                                            | Sp2197-2 | CTCGAGTGCGGCCGCAAGCTTT<br>TTCACAAATTCGTTGGTGAAG |
| SP2207<br>(30-end)  | competence protein<br>ComF, putative                       | Sp2207-1 | CGGGATCCGAATTCGAGCTCCT<br>GTTCAGACTGTGATTCTAC   |
|                     |                                                            | Sp2207-2 | CTCGAGTGCGGCCGCAAGCTTT<br>CTTACAAGGGAAAATGTT    |
| SP2218<br>(106-end) | rod shape-determining<br>protein MreC<br>(IMGterm)         | Sp2218-1 | CGGGATCCGAATTCGAGCTCCT<br>CTAAATTGCAAGCCACAAAG  |
|                     |                                                            | Sp2218-2 | CTCGAGTGCGGCCGCAAGCTTT<br>GAATTCCCCACTAATTCTATC |

\* Amino acid residues used for cloning; end refers to C-terminus.
