# Supplementary material
Source: PubMed Central journal article supplement (PMC6204694)
Supplement: zii999092580s2.pdf [file zii999092580s2.pdf]

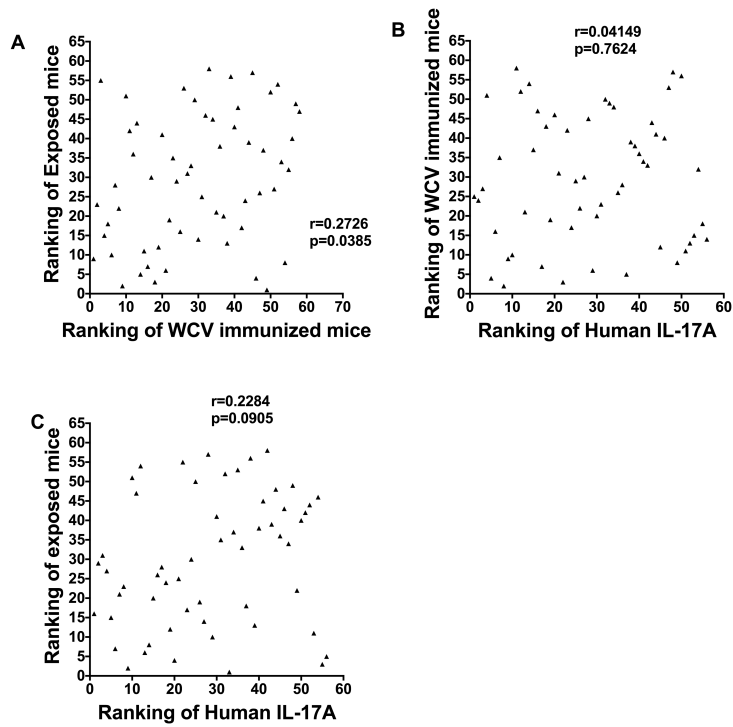

Figure S1. Correlation between different screens. The ranking of each antigen was analyzed for their correlation between each screen using nonparametric Spearman method. A. Correlation between screens from immunized mice and exposed mice. B. Correlation between screens IL-17A from human and immunized mice. C. Correlation between screens IL-17A from human and exposed mice.
